# Supplementary material for: RNA‐seq analysis of ageing human retinal pigment epithelium: Unexpected up‐regulation of visual cycle gene transcription
Source: PubMed Central journal article supplement (PMC8184696; doi:10.1111/jcmm.16569), 2021-05-01
Supplement: JCMM-25-5572-s004.pdf [file JCMM-25-5572-s004.pdf]

Fig S1

A

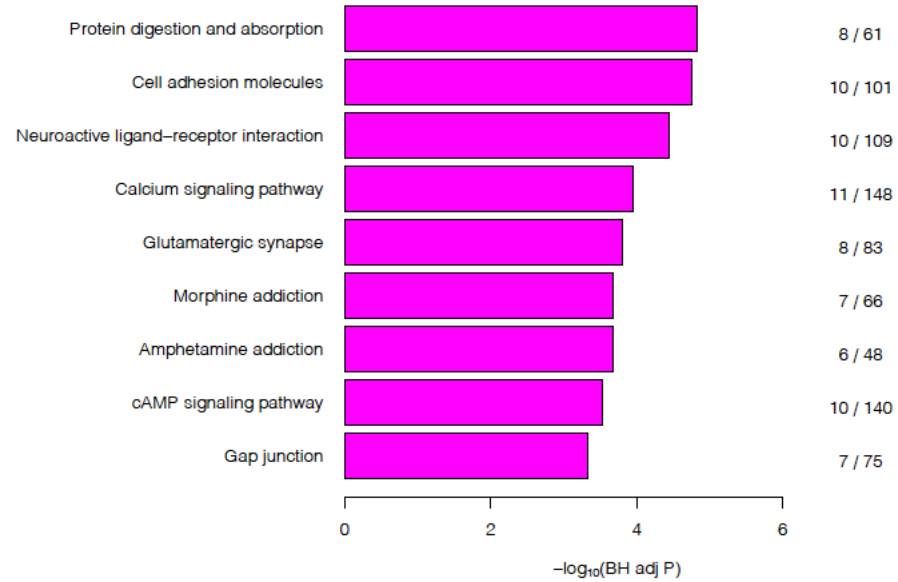

B

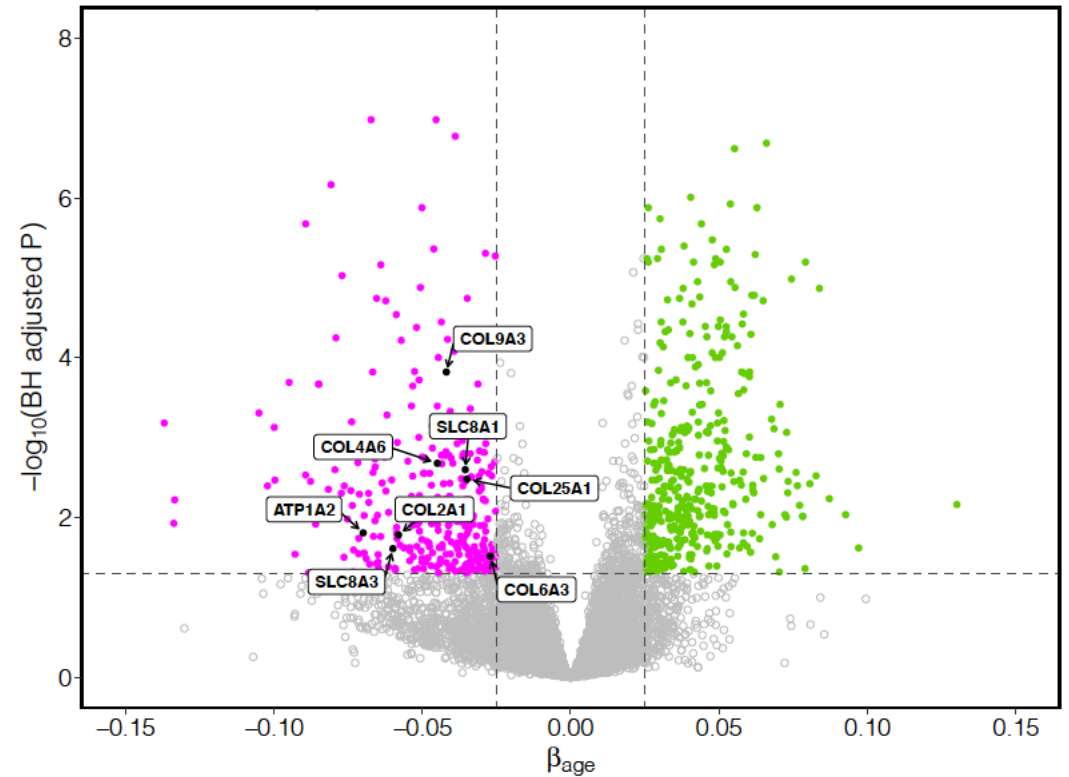

**Fig. S1.** RNA-seq of RPE reveals many pathways are transcriptionally down-regulated with increasing human age. (A) The top most significantly enriched pathways with down-regulated SCGs. All pathways shown have a BH adjusted  $P < 0.05$ . Fraction represents the number of down SCGs in the pathway over the total number of genes in the pathway. (B) Volcano plot showing up-regulated SCGs in green and down-regulated in magenta. Genes in the *protein digestion and absorption* KEGG pathway are labelled.
